# Supplementary material
Source: PubMed Central journal article supplement (PMC3219821)

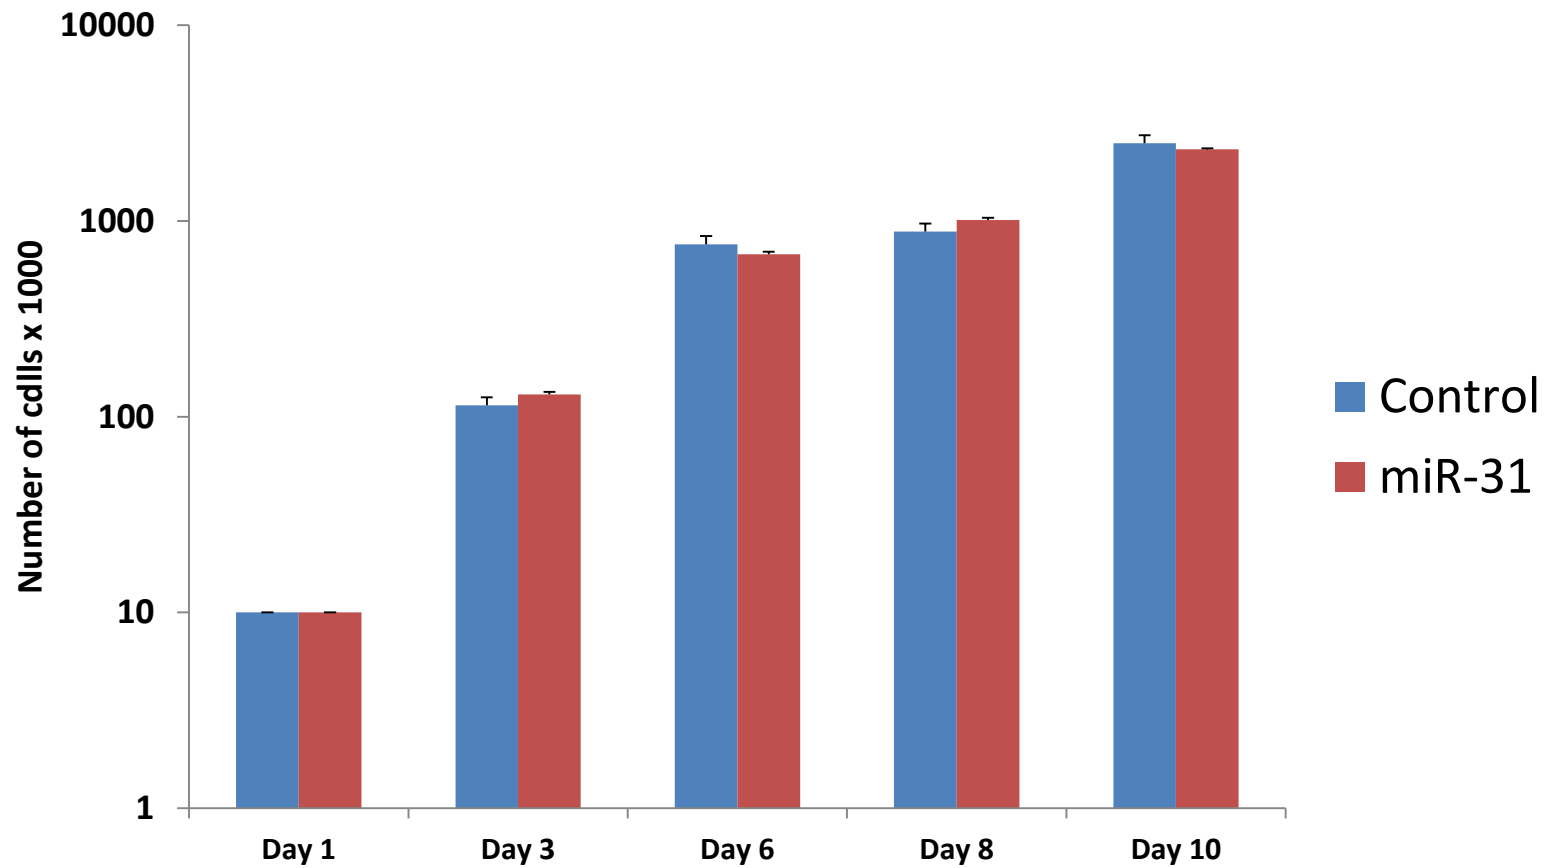

Figure S1

Supplement: NIHMS321490-supplement-2.pdf [file NIHMS321490-supplement-2.pdf]

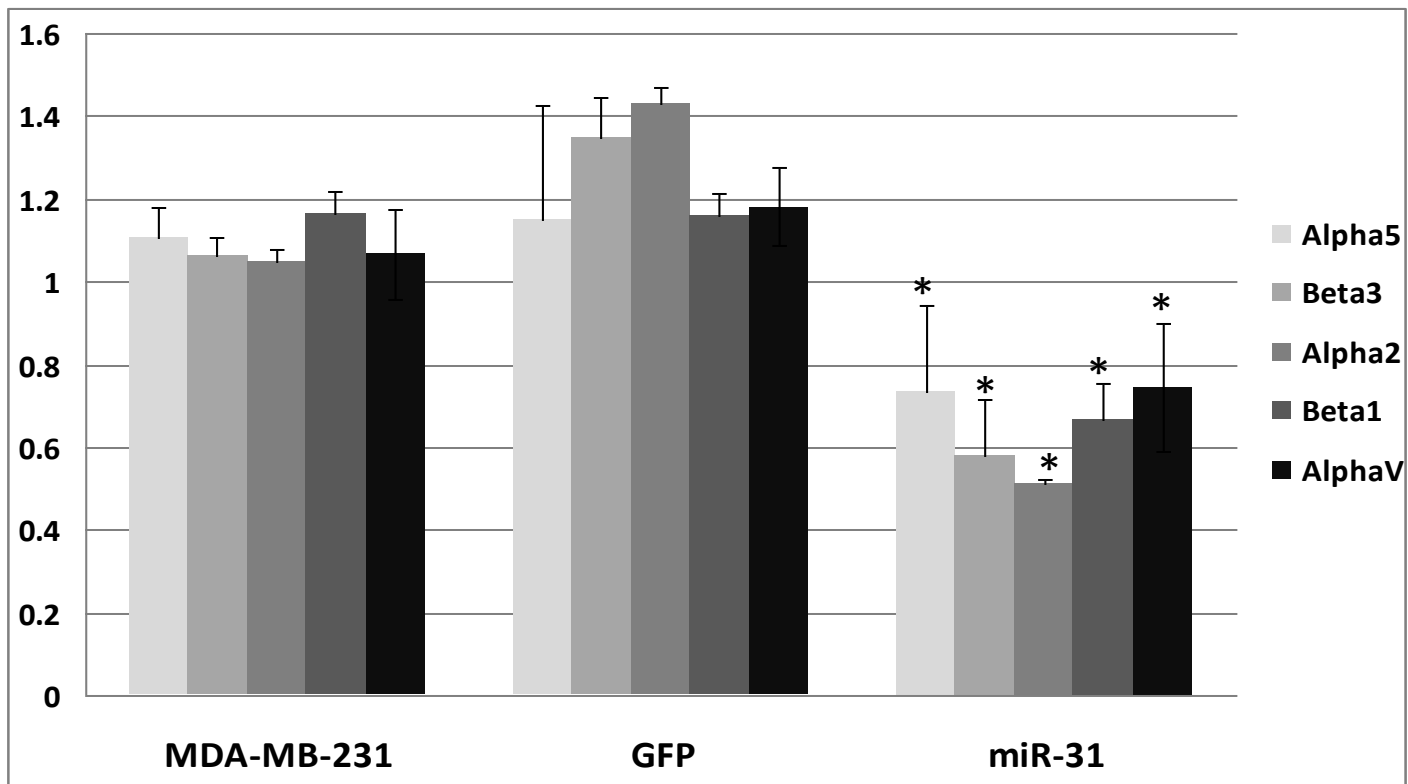

Figure S2

Supplement: NIHMS321490-supplement-3.pdf [file NIHMS321490-supplement-3.pdf]

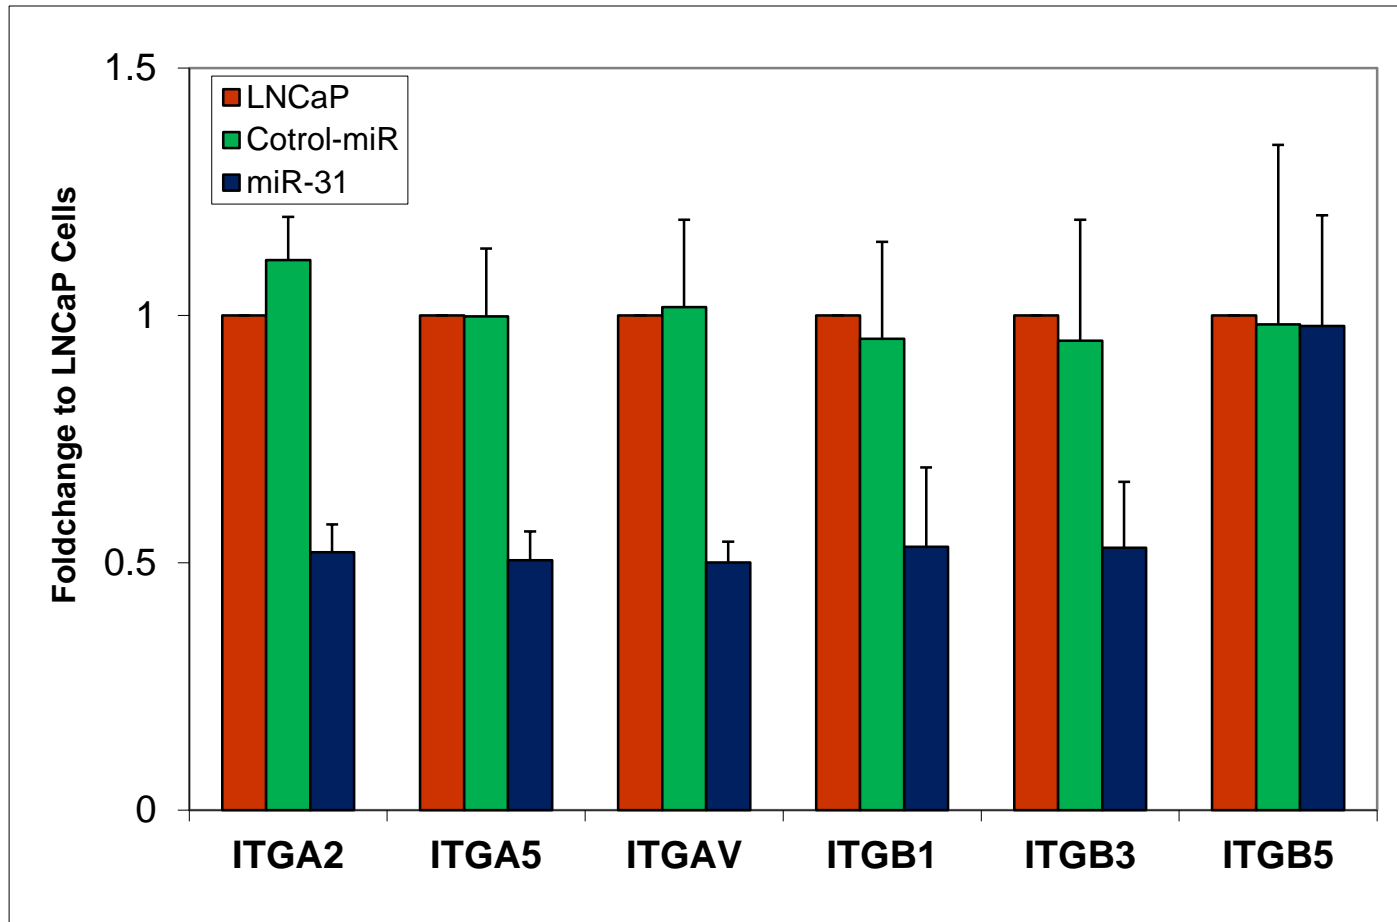

Figure S3

Supplement: NIHMS321490-supplement-4.pdf [file NIHMS321490-supplement-4.pdf]

**A**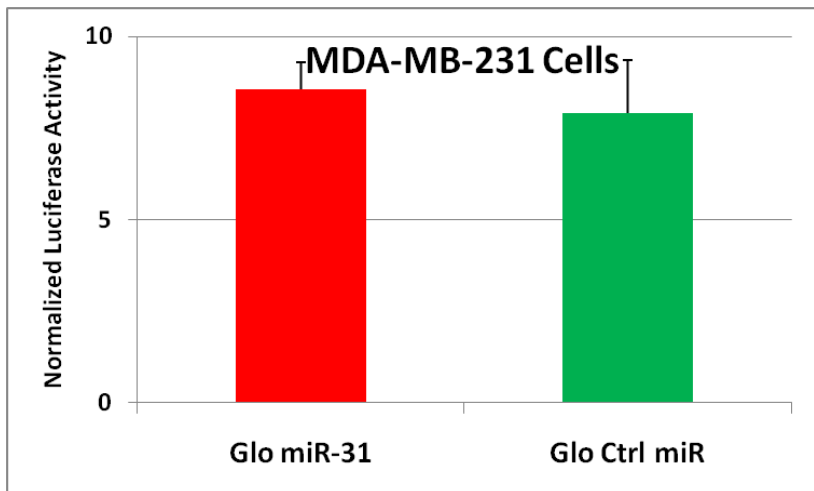**B**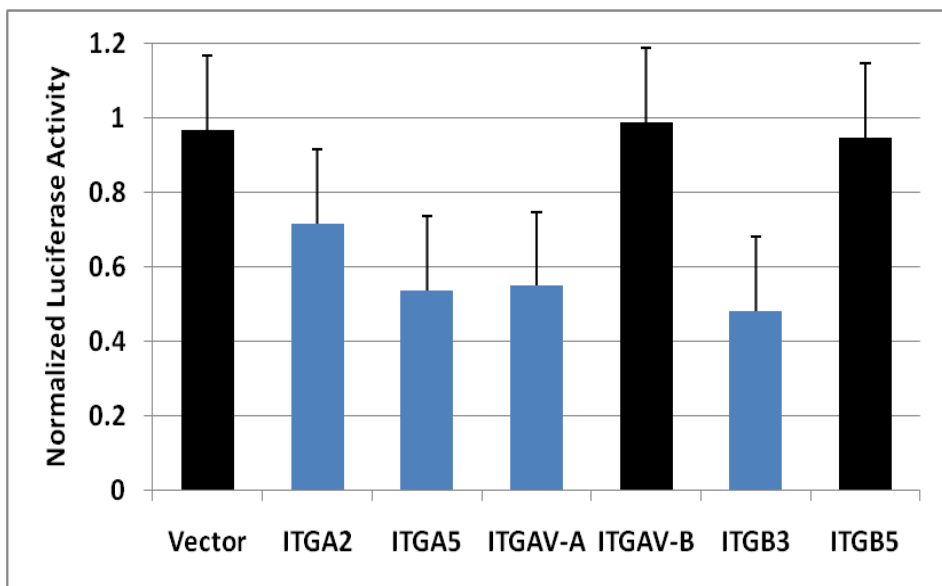**C**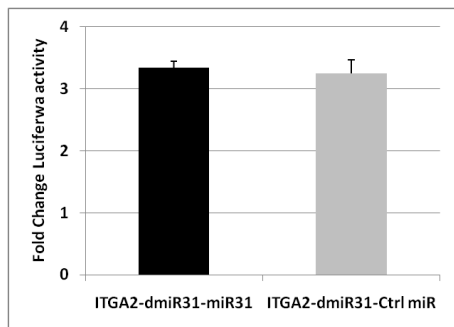**D**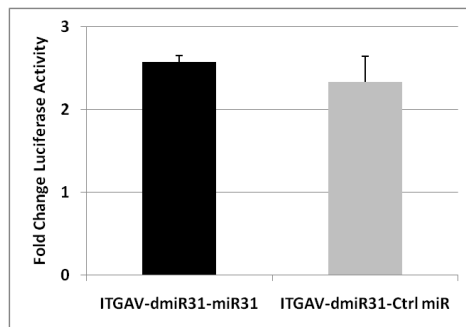**E**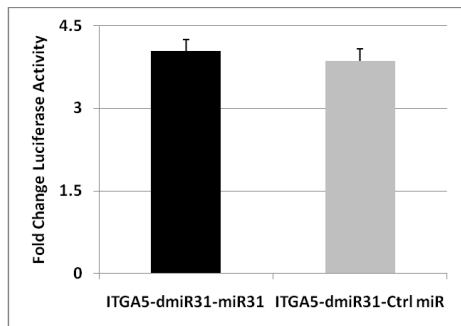**F**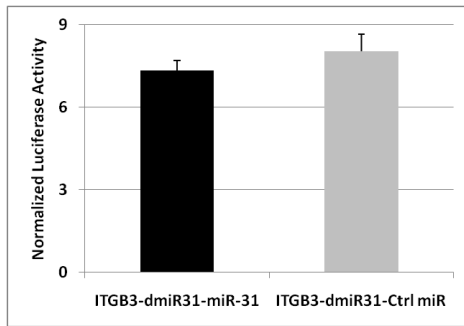

Figure S4

Supplement: NIHMS321490-supplement-5.pdf [file NIHMS321490-supplement-5.pdf]

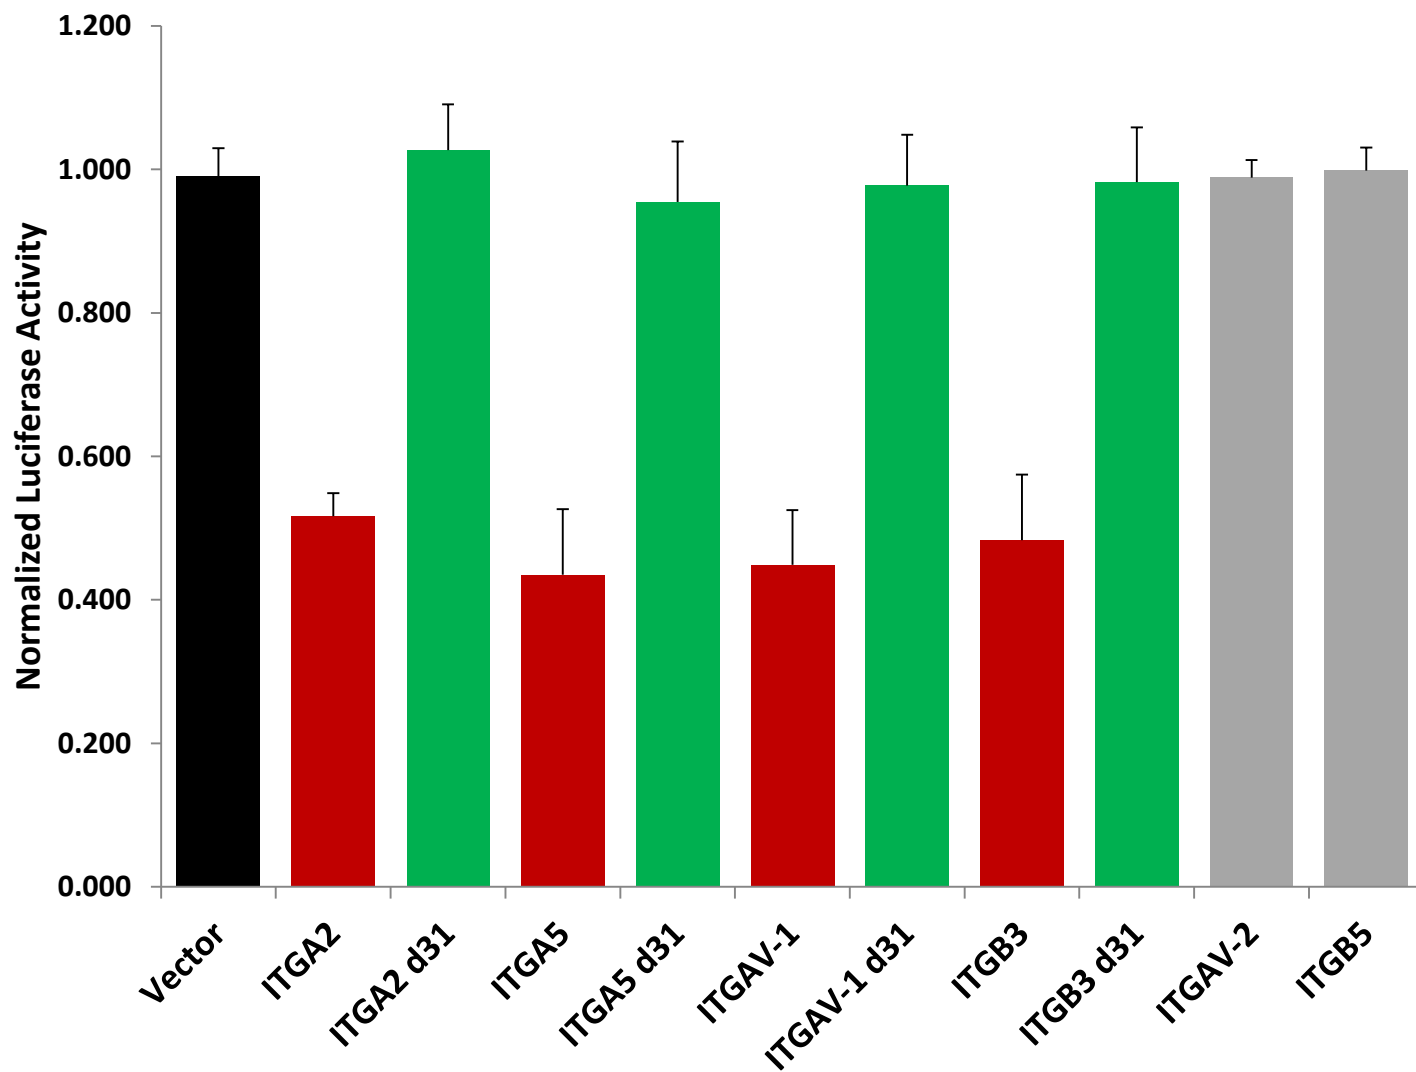

Figure S5

Supplement: NIHMS321490-supplement-6.pdf [file NIHMS321490-supplement-6.pdf]

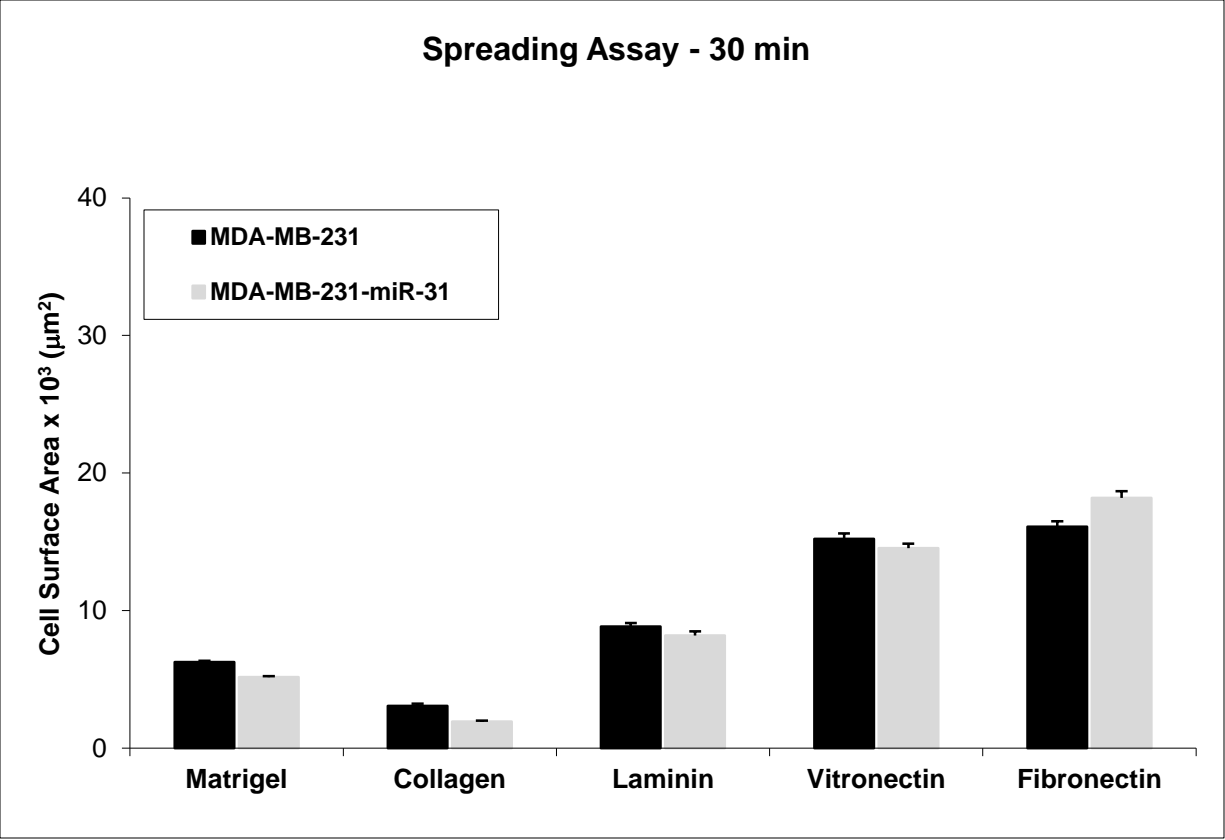

Figure S6

Supplement: NIHMS321490-supplement-7.pdf [file NIHMS321490-supplement-7.pdf]
